# Supplementary material
Source: PubMed Central journal article supplement (PMC2847180)
Supplement: NIHMS29270-supplement-1.pdf [file NIHMS29270-supplement-1.pdf]

## Supplemental Data

### Active and Repressive Chromatin Is Interspersed without Spreading in an Imprinted Gene Cluster in the Mammalian Genome

Kakkad Regha, Mathew A. Sloane, Ru Huang, Florian M. Pauler, Katarzyna E. Warczok, Balázs Melikant, Martin Radolf, Joost H. A. Martens, Gunnar Schotta, Thomas Jenuwein, and Denise P. Barlow

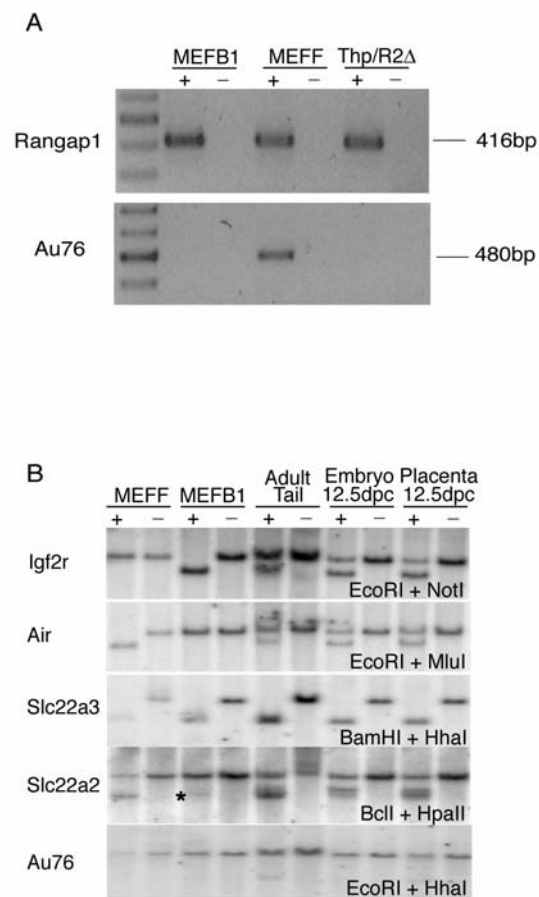

**Figure S1. Lack Of *Au76*-psg Expression And DNA Methylation Status Of Genes In The *Igf2r* Cluster**

(A) RT-PCR showing that the signal observed for the *Au76*-psg on both parental chromosomes in Fig.1B arises from cross-hybridization of the expressed ancestor *Rangap1*

gene located on chr.15. Sequence specific primers identify a 416bp band from the expressed *Rangap1* chr.15 gene sequence in all cell types and a 480bp band specific to *Au76* in MEF cells carrying only the paternal chromosome. This latter signal arises from *Au76* sequences contained within the *Air* ncRNA as it is absent in  $T^{hp}/R2\Delta$  cells that carry a paternal deletion of the *Air* promoter and lack *Air* expression (Wutz et al., 2001). (-), negative RT-PCR controls.

**(B)** DNA blots showing DNA methylation of promoter and pseudogene regions. Genomic DNA was digested either with a non-methyl sensitive plus a methyl sensitive enzyme (+ lanes, NotI, MluI, HhaI, HpaII) or with a single non-methyl sensitive enzyme (- lanes). The detection of the same sized band in (+) and (-) lanes indicates methylation. The *Igf2r* CpG island promoter (probe AJ249895 94104-99431) is methylated in MEF cells that only contain a paternal chromosome, unmethylated in MEFB1 that only contain a maternal chromosome. Diploid adult and embryonic tissues contain both parental chromosomes and show a cut unmethylated and uncut methylated *Igf2r* fragment. The *Air* CpG island promoter (probe AJ249895 124992-126086) shows maternal-specific methylation at all stages. The *Slc22a3* CpG island promoter (probe UCSC Mouse Feb 2006 Chr.17: 12347702-12348110) is unmethylated (also at BssHII, data not shown). The *Slc22a2* promoter (probe UCSC Mouse Feb 2006 Chr.17: 12429198-12429606) lacks a CpG island and is partially methylated on both parental chromosomes. MEF cells showed less methylation than MEFB1 cells (\*faint band on original image). However, this is likely to be a cell variation as  $T^{hp}/+$  and  $+/T^{hp}$  embryonic tissues lack parental-specific methylation (Zwart et al., 2001). The *Au76* fragment (probe AJ249895 bp43732-44140) is a CG poor region and is methylated on both parental chromosomes. Complete digestion by methyl-sensitive enzymes was confirmed by rehybridization of blots with the *Htf9* CpG island (Accession number X05830) that lacks DNA methylation (data not shown).

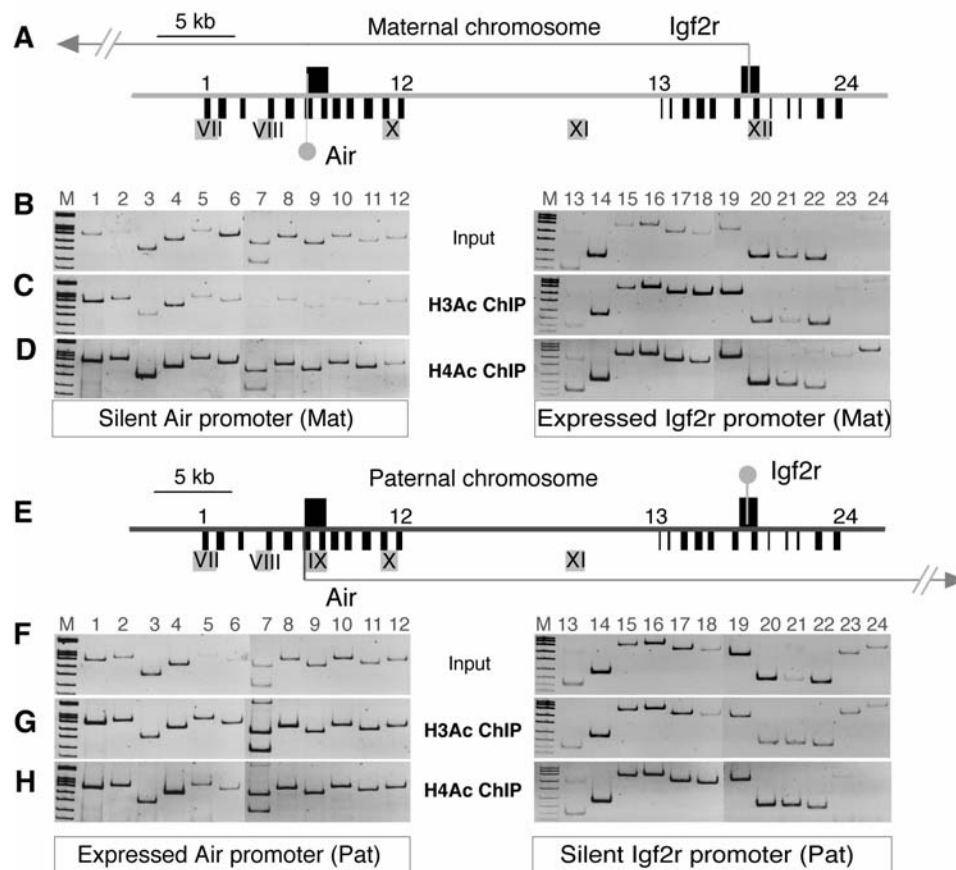

**Figure S2. H3 And H4 Acetylation On The Expressed And Silent *Igf2r* And *Air* Promoters**

(A) 40kb sequence based map showing the expression pattern of *Igf2r* and *Air* on the maternal chromosome (light grey line). Details as in Fig.2A.

(B-D) ChIP-PCR from MEFB1 cells that have only the maternal allele of the *Igf2r* cluster using multi-acetylation antibodies against H3 (K9+K14) acetylation (panels H3Ac) and H4 (K5+K8+K12+K16) acetylation (panels H4Ac).

(E) 40kb sequence based map showing the expression pattern of *Igf2r* and *Air* on the paternal chromosome (dark grey line).

(F-H) ChIP-PCR from MEFB1 cells that have only the paternal allele of the *Igf2r* cluster using multi-acetylation antibodies against H3 (K9+K14) acetylation (panels H3Ac) and H4 (K5+K8+K12+K16) acetylation (panels H4Ac).

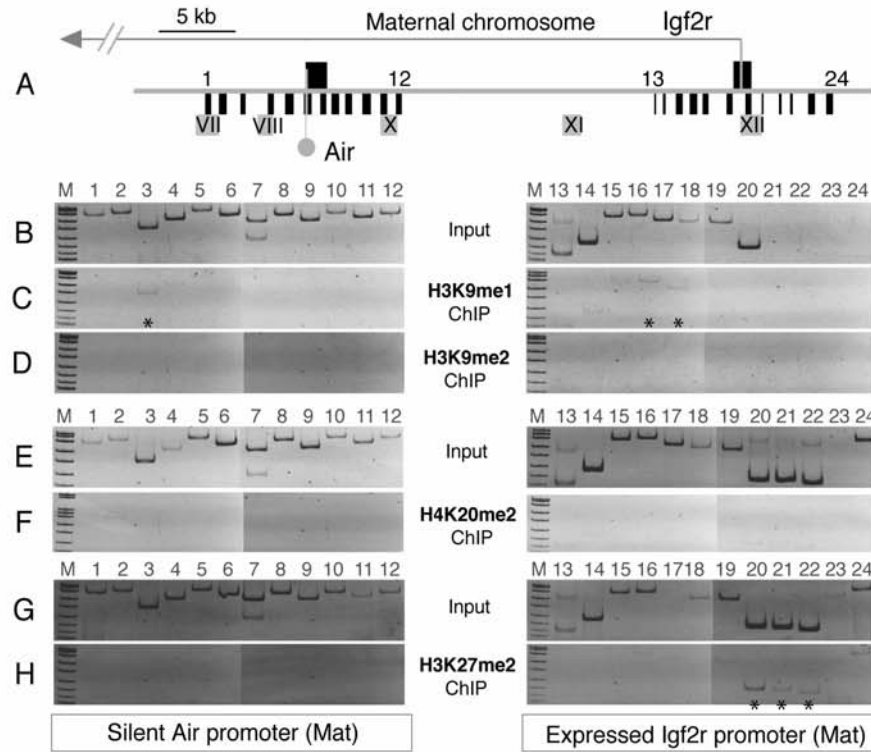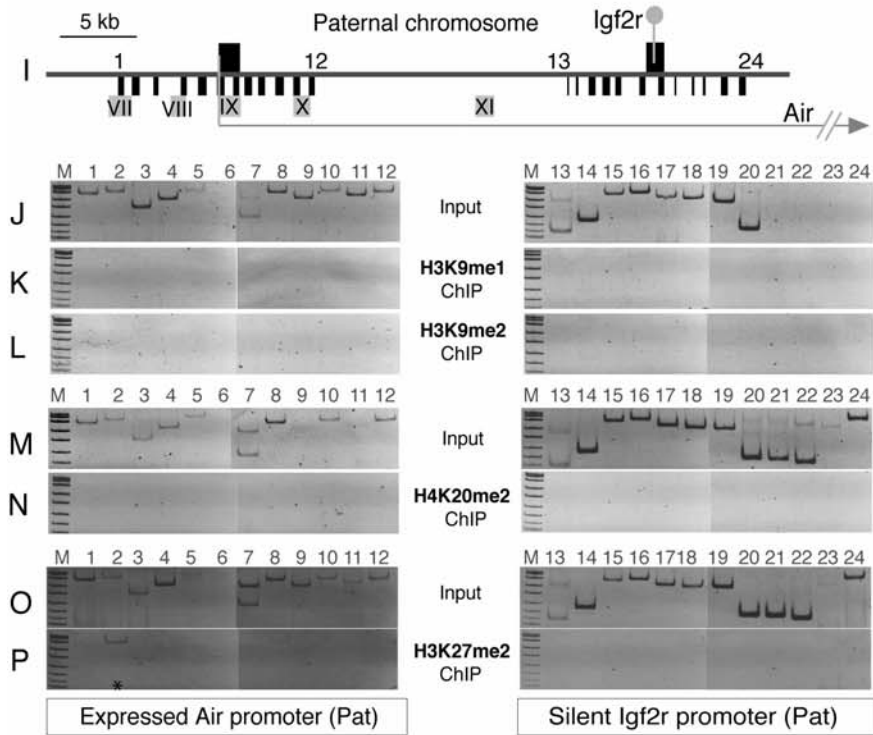

**Figure S3. Mono And Di-Methyl Modifications Of H3K9, H3K27 And H4K20**

(A) 40kb sequence based map showing the expression pattern of *Igf2r* and *Air* on the maternal chromosome (light grey line).

(B-H) ChIP-PCR from MEFB1 cells that have only the maternal allele of the *Igf2r* cluster using antibodies against H3K9me1, H3K9me2, H4K20me2 and H3K27me2. Primers 20-22 showed reproducible faint H3K27me2 signals.

(I) 40kb sequence based map showing the expression pattern of *Igf2r* and *Air* on the paternal chromosome (dark grey line).

(J-P) ChIP-PCR from MEFB cells having the paternal allele of the *Igf2r* cluster using antibodies against H3K9me1, H3K9me2, H4K20me2 and H3K27me2. A few primers variably produced weak H3K27me2 signals. \*faint inconsistent signals.

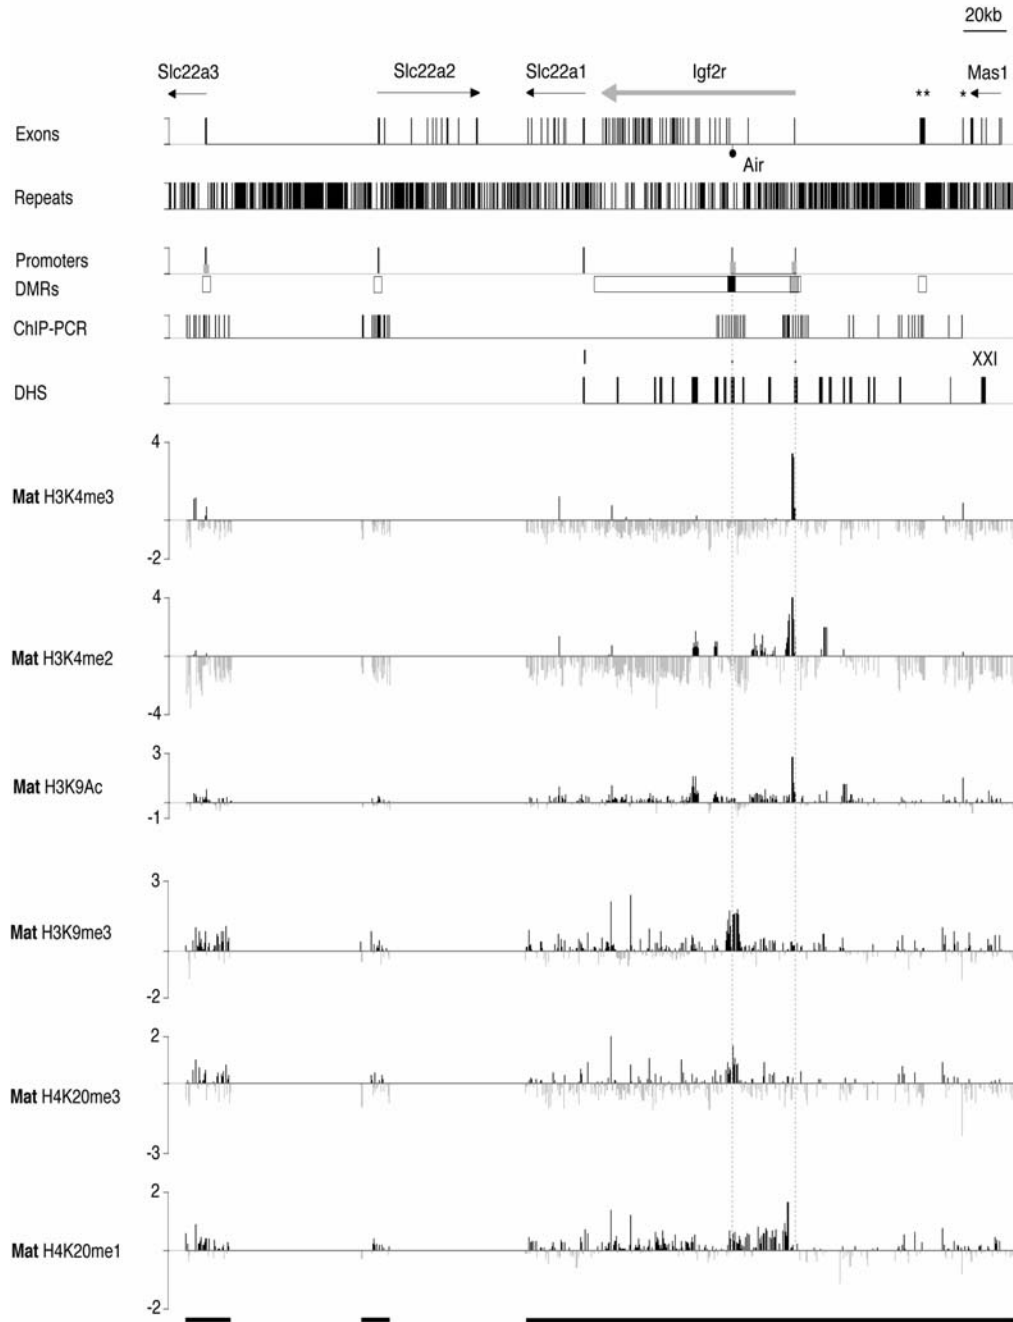

**Figure S4. ChIP-Chip Assay Of Histone Marks On The Maternal *Igf2r* Imprinted Cluster**

Biological replica of data in Fig.3 showing that active and repressive marks are interspersed and show limited spreading in the maternal *Igf2r* imprinted cluster. Details as Fig.3.

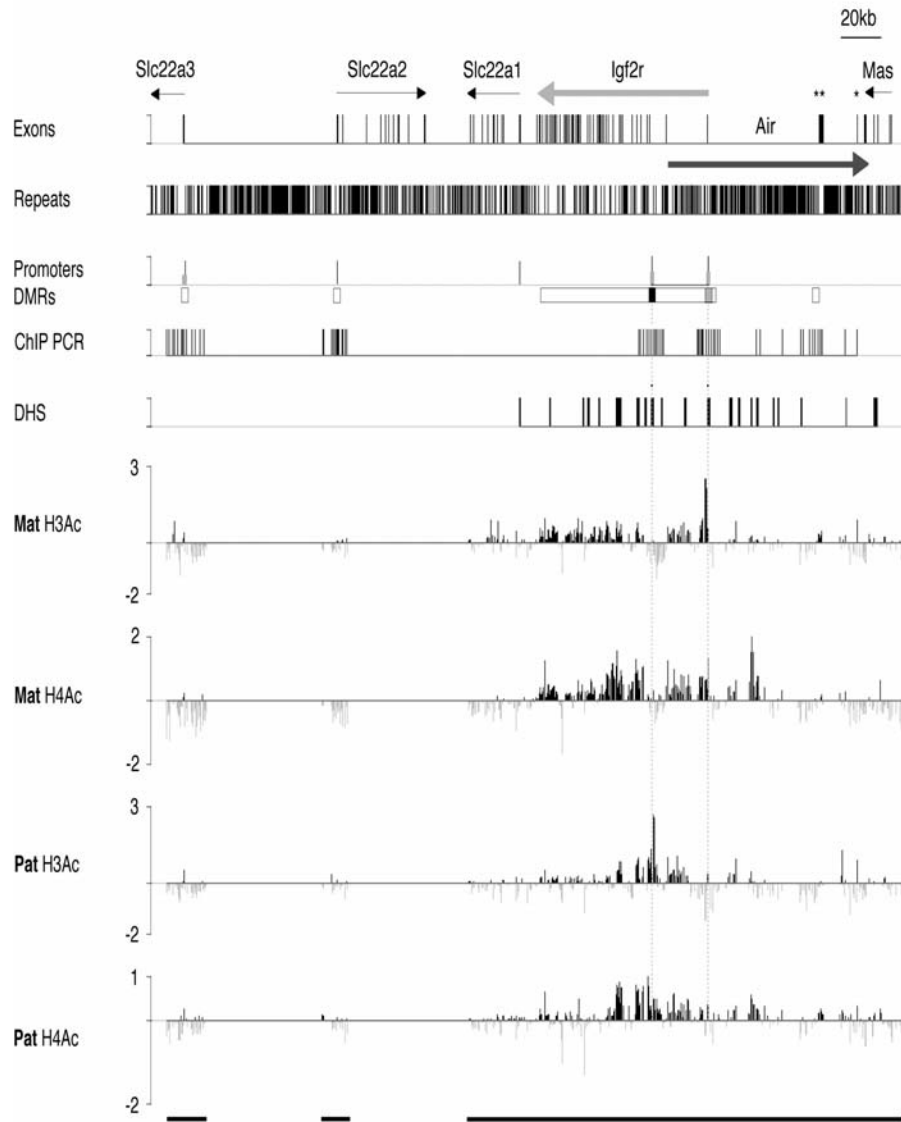

**Figure S5. ChIP-Chip Assay Of General H3 And H4 Acetylation Patterns In The *Igf2r* Imprinted Gene Cluster**

ChIP-DNA analyzed by PCR in Sup.Fig.2 was assayed by ChIP-Chip with a custom PCR tiling array as described in Fig.3. Mat; maternal chromosome analyzed in MEFB1 cells, Pat; paternal chromosome analyzed in MEFB cells.

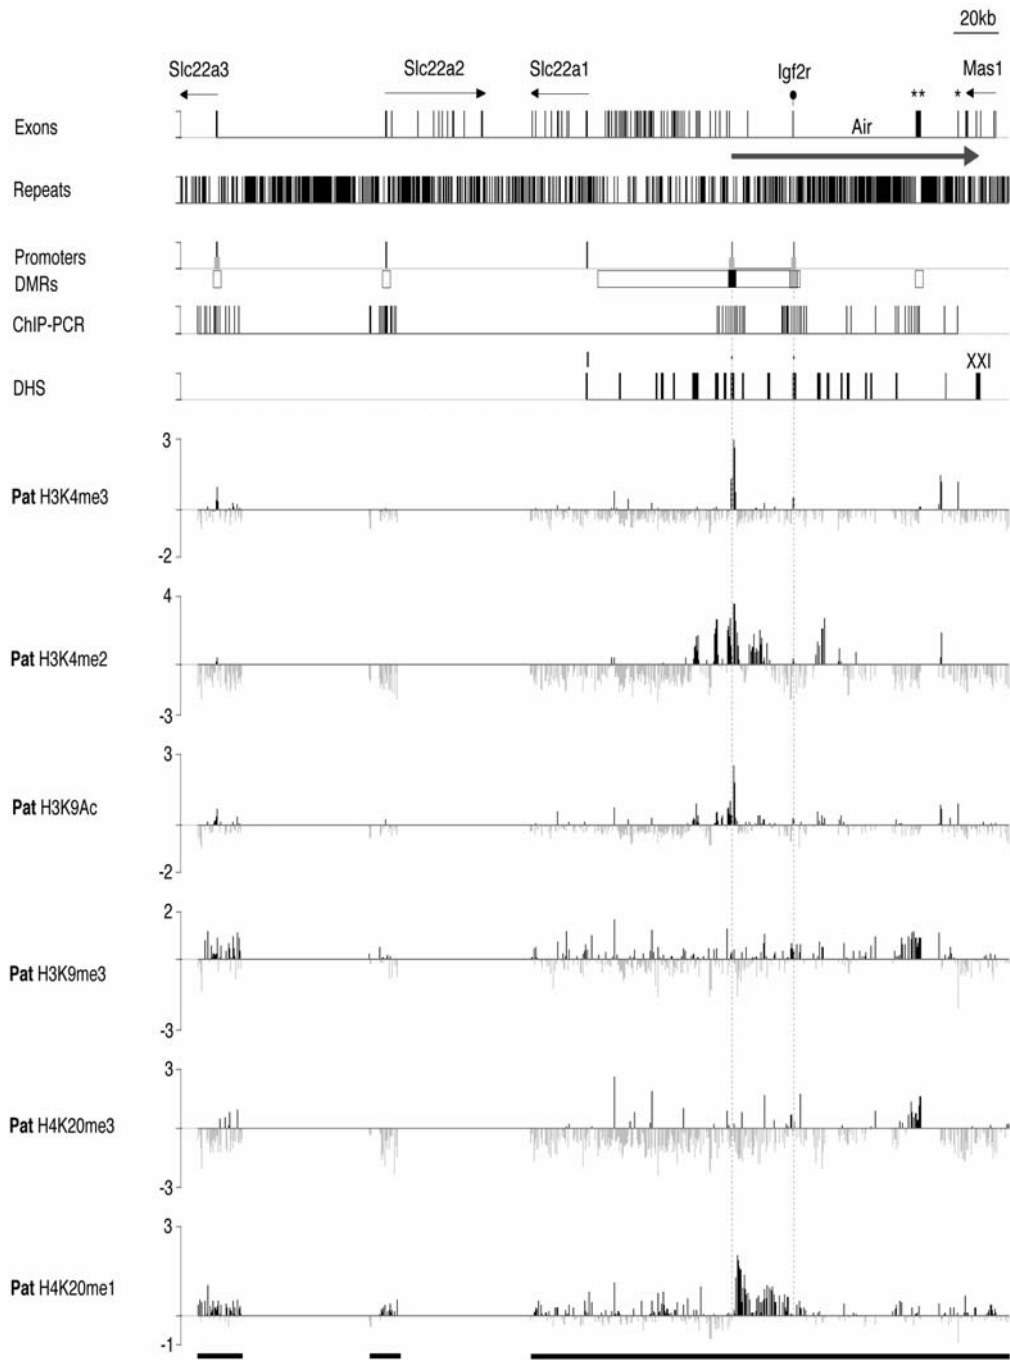

**Figure S6. ChIP-Chip Assay Of Histone Marks On The Paternal *Igf2r* Imprinted Cluster**

Biological replica of data in Fig.4 showing that active and repressive marks are interspersed and show limited spreading in the paternal *Igf2r* imprinted cluster. Details as Fig.4.



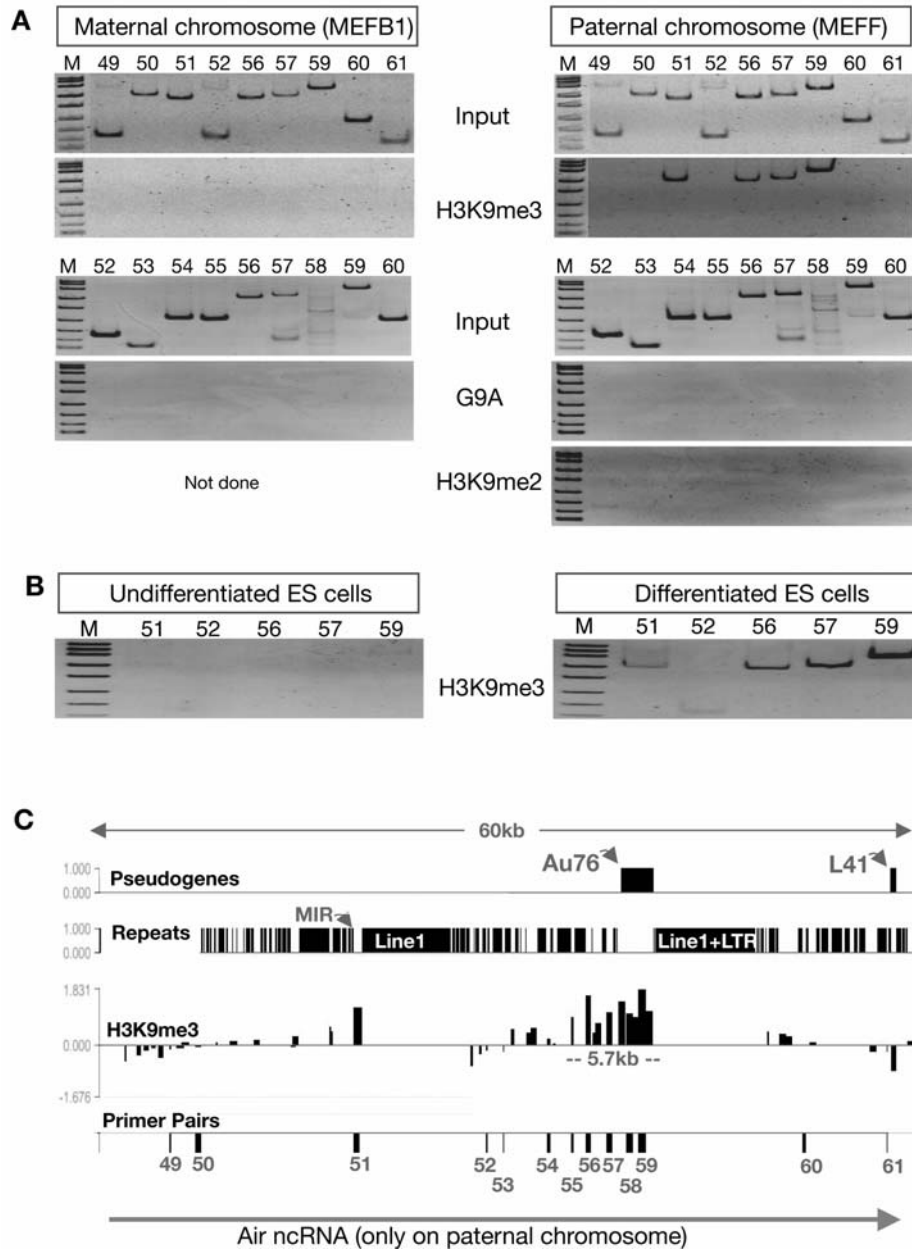

**Figure S7. Paternal Specific Repressive Histone Modifications At The *Au76*-psg**

(A) ChIP-PCR of H3K9me3, G9a and H3K9me2 modifications on the *Au76*-psg in MEFB1 (maternal chromosome) and MEFF (paternal chromosome) cells. H3K9me3 is also seen as a broad peak over the *Au76*-psg in the ChIP-Chip experiment only on the paternal chromosome (Fig.4) but H3K9me2 and G9a are not present on the paternal chromosome.

(B) ChIP-PCR of H3K9me3 in undifferentiated CCE ES cells and in differentiated CCE ES cells (treated in the absence of LIF with 5 $\mu$ M/ml Retinoic Acid for 5 days) shows that the H3K9me3 peak is not a germ line mark, but is acquired in ES cells during differentiation.

(C) An enlargement of a 60kb region from Fig.4 showing the relationship between the HC-peak on the *Au76-psg* (NCBI accession number AJ249895) and the interspersed repeat distribution. Primer pairs (N<sup>o</sup> 49-61) used for ChIP-PCR are indicated below. Details as Fig.3. Note that repeats were not included in the custom PCR tiling array and that *Au76-psg* primers do not amplify the host *Rangap1* gene on chr.15 (Sup.Fig.1).

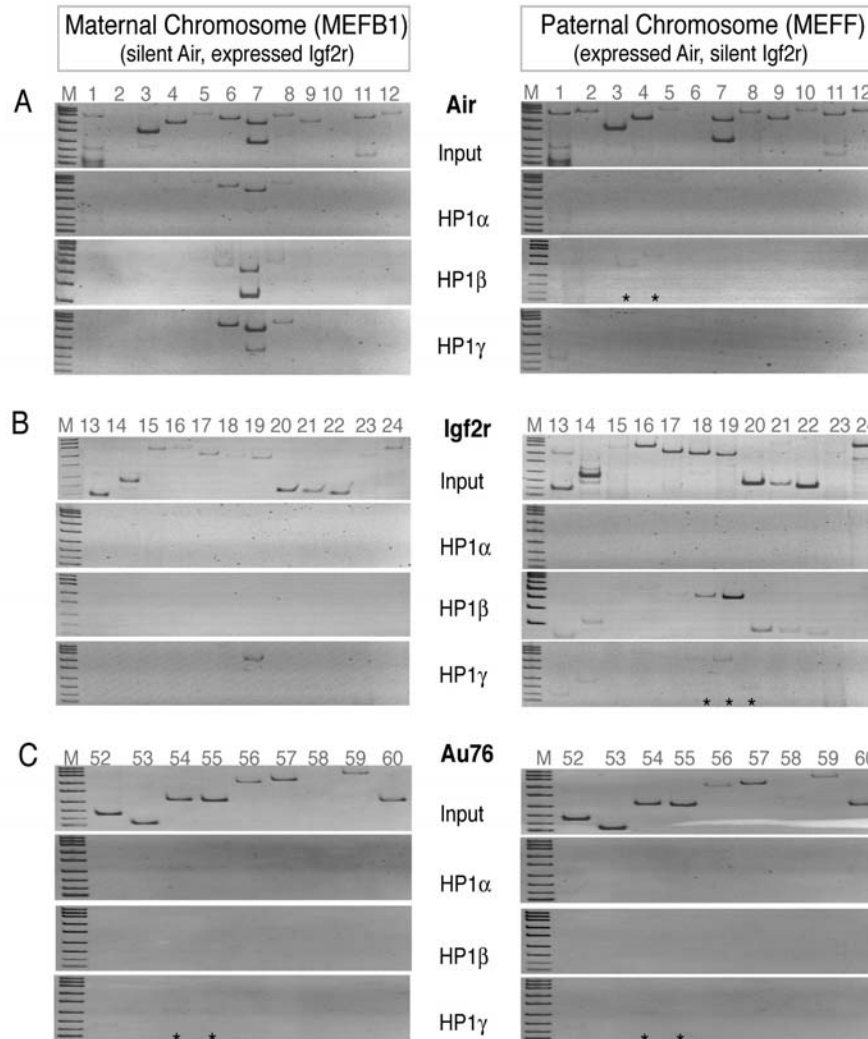

**Figure S8. HP1 Isoforms On The Silent *Air* And *Igf2r* Promoters And The *Au76-psg***

ChIP-PCR analysis of the (A) *Air* promoter, (B) *Igf2r* promoter and (C) *Au76-psg* in MEFB1 cells containing only the maternal *Igf2r* cluster (left panels) and MEFB1 cells containing only the paternal *Igf2r* cluster (right panels), using antibodies for HP1 $\alpha$ , HP1 $\beta$  and HP1 $\gamma$ . \*faint reproducible signals.

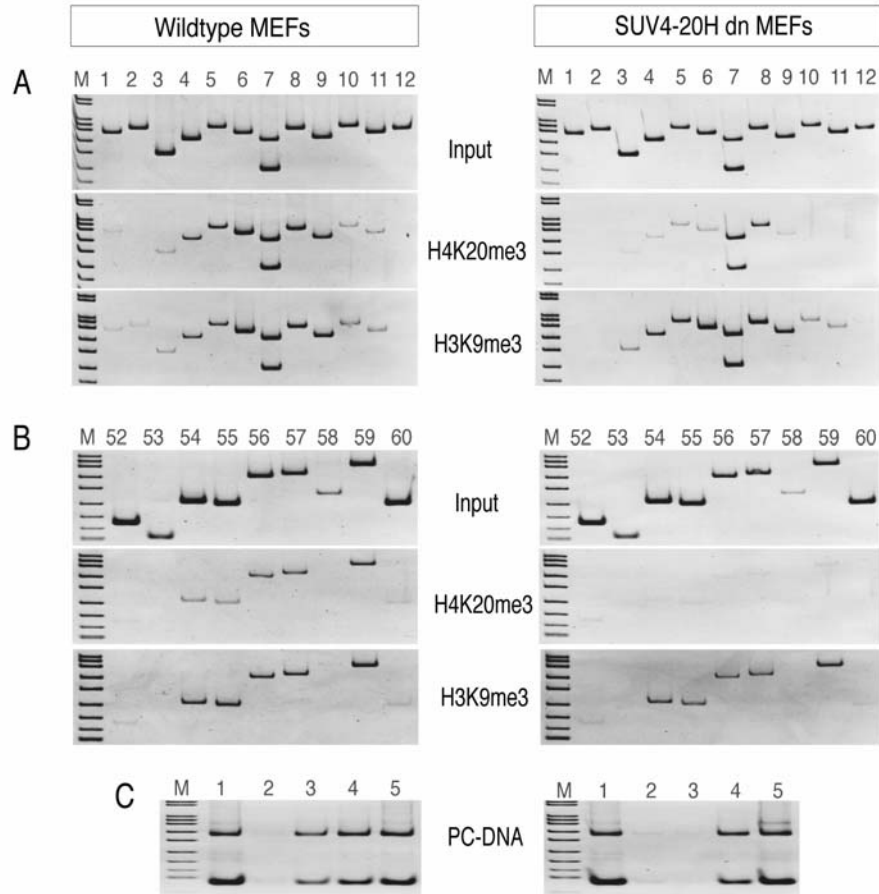

**Figure S9. H3K9me3 Stability In Cells Lacking SUV4-20H Histone Tri-methylases**

ChIP-PCR analysis of (A) *Air* promoter, (B) *Au76*-psg and (C) pericentric DNA in wildtype and mutant MEFs lacking SUV4-20H1,H2 (SUV4-20H dn) (Schotta et al., 2004) using antibodies for H3K9me3 and H4K20me3. Note that H4K20me3 is mostly lost from the *Au76*-psg in SUV4-20H null cells while it is reduced but still present at the silent *Air* promoter. In both cases the reduction in H4K20me3 does not change the H3K9me3 signal. Quantitative PCR showed that *Air* and *Igf2r* expression levels were similar in wildtype and mutant cells (data not shown). Lane numbers in (A), (B) indicate primer pairs. Lane numbers in (C): 1;Input, 2;Mock, 3;H4K20me3, 4;H3K9me3, 5;HP1 $\beta$  show that pericentric DNA loses H4K20me3 in SUV4-20H null cells as reported (Schotta et al., 2004).

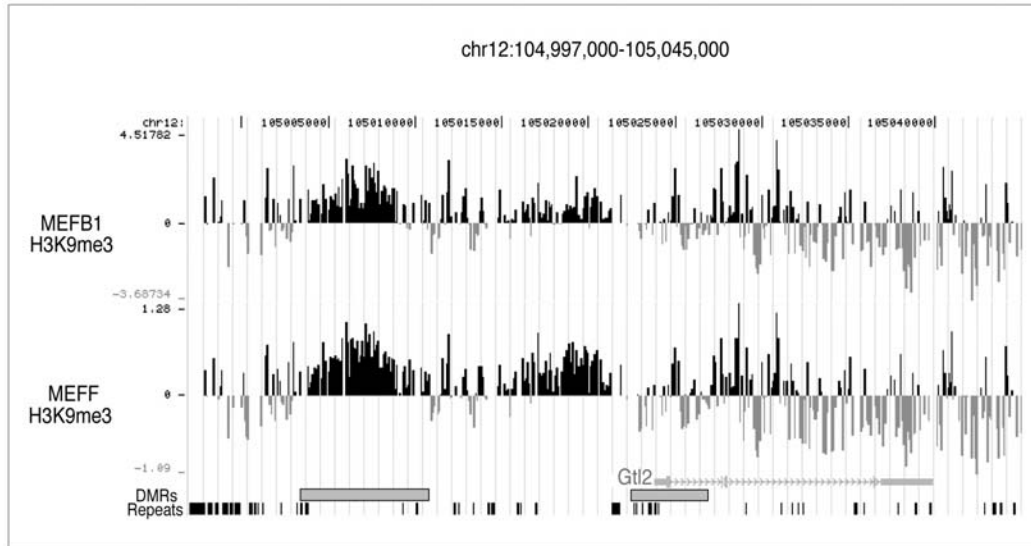

**Figure S10. The Imprinted *Gtl2* ncRNA Is Marked Upstream By Focal Heterochromatin Peaks**

ChIP-Chip showing the H3K9me3 profile over a 48kb region of mouse chromosome 12 (104,997,000-105,045,000) containing the imprinted *Gtl2* ncRNA indicated underneath. Preparation of the tiling array and hybridization were undertaken by Agilent Technologies, Inc. Two approximately 5kb long heterochromatin peaks can be seen, one is on the upstream DMR (known as the IG-DMR (Lin et al., 2003)), the other lies between this and the *Gtl2* transcription start. MEFB1 and MEF cells are diploid for mouse chromosome 12 and provide biological replicates for this experiment. DMRs; regions showing parental-specific DNA methylation, Repeats; total repeats identified by RepeatMasker ([www.repeatmasker.org](http://www.repeatmasker.org)).

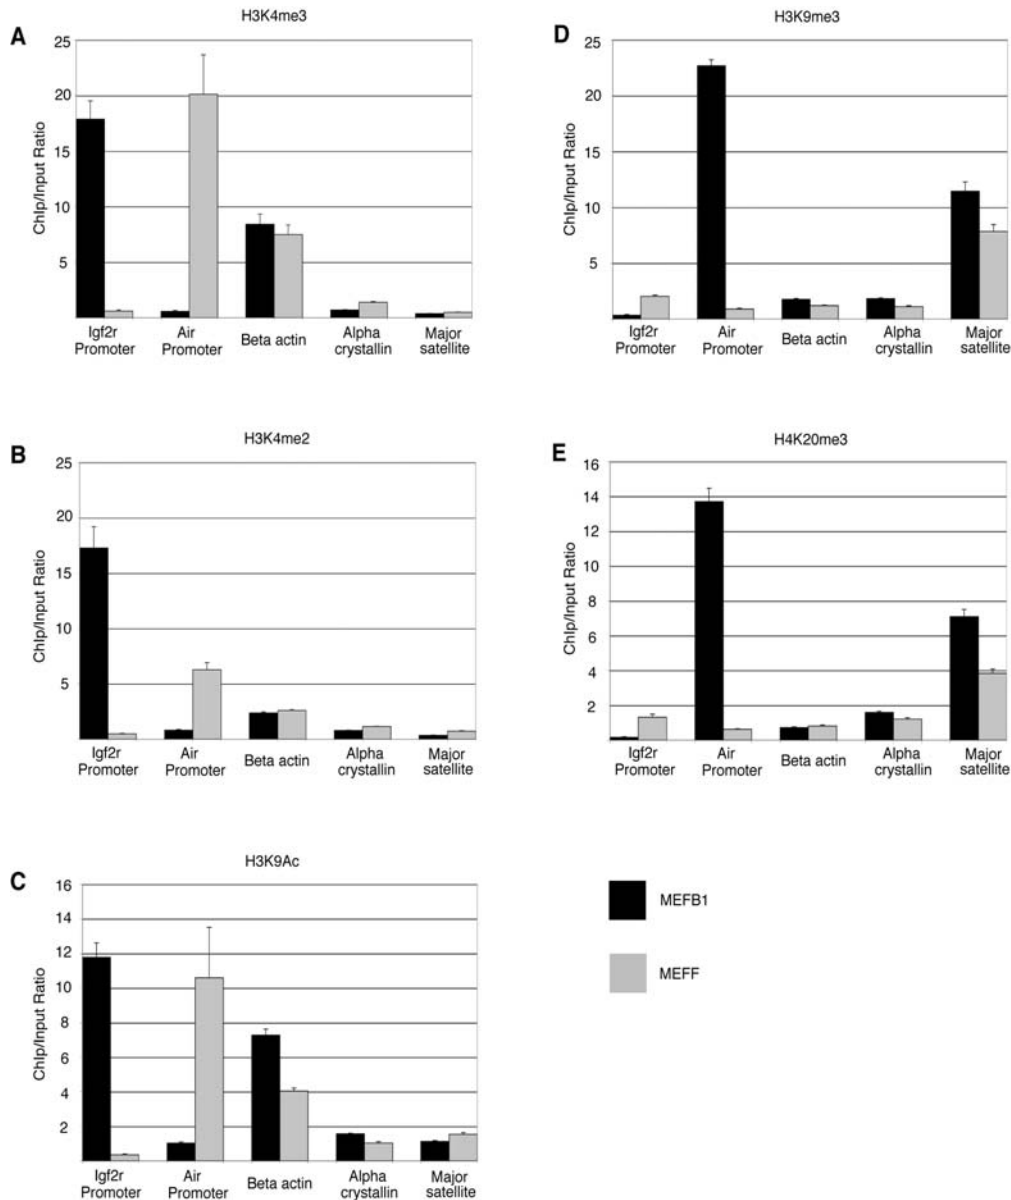

**Figure S11. ChIP-Chip Control DNA Sequences**

Controls for active (A) H3K4me3, (B) H3K4me2 (C) H3K9Ac and repressive (D) H3K9me3, (E) H4K20me3, histone modifications from the custom PCR genome tiling array. Each graph shows controls from one biological replica using data obtained from ChIP-Chip. The columns and error bars show, respectively, the average ChIP/Input ratio and standard deviation of the eight replicate spots on the array. This data shows that the antibodies used can distinguish active genes (beta actin) from silent genes (alpha crystallin) and heterochromatin (major satellites). This data also show that the MEFB1 and MEFF cells used here to identify

parental-specific modifications, are similarly modified on beta actin, alpha crystallin and the major satellites. Data for the *Igf2r/Air* promoters is shown for comparison. Columns represent the average ChIP/Input ratio of eight spots. Black columns; MEFB1, Grey columns; MEFB.

**Table S1. Quantitative Real-Time Assays For ChIP-PCR Validation**

| Q-PCR assay                                                                                                                                                                                                                                                                                                                                                                                                                                                                                                                                                                                                                                                                                                                                                                                                                                                                                                                                                                                                                                                                                                                      | <i>Air</i> -132<br>TM assay                                                                          | <i>Air</i> -128<br>TM assay                                                               | <i>Air</i> -UPSTREAM<br>SG assay                                                                 | <i>Air</i> -START<br>SG assay                                                           | <i>Air</i> -126<br>TM assay                                                         | <i>Air</i> -125<br>TM assay                                                      |
|----------------------------------------------------------------------------------------------------------------------------------------------------------------------------------------------------------------------------------------------------------------------------------------------------------------------------------------------------------------------------------------------------------------------------------------------------------------------------------------------------------------------------------------------------------------------------------------------------------------------------------------------------------------------------------------------------------------------------------------------------------------------------------------------------------------------------------------------------------------------------------------------------------------------------------------------------------------------------------------------------------------------------------------------------------------------------------------------------------------------------------|------------------------------------------------------------------------------------------------------|-------------------------------------------------------------------------------------------|--------------------------------------------------------------------------------------------------|-----------------------------------------------------------------------------------------|-------------------------------------------------------------------------------------|----------------------------------------------------------------------------------|
| Position relative to primer pairs in Fig.2,3<br>Accession Nr:AJ249895                                                                                                                                                                                                                                                                                                                                                                                                                                                                                                                                                                                                                                                                                                                                                                                                                                                                                                                                                                                                                                                            | 132542-132627<br>Primer-pair 1                                                                       | 128561-128642<br>Primer-pair 4                                                            | 127006-127079<br>Between primer-pairs 5 & 6                                                      | 126177-126243<br>Primer-pair 6a*                                                        | 126212-126278<br>Primer-pair 6b*                                                    | 125224-125297<br>Primer-pair 7                                                   |
| Primer sequence                                                                                                                                                                                                                                                                                                                                                                                                                                                                                                                                                                                                                                                                                                                                                                                                                                                                                                                                                                                                                                                                                                                  | <b>F:</b><br>GAACTGCC<br>AGTGACAA<br>GTGGTAAT<br><b>R:</b><br>GCACTGTT<br>GCAGAAGT<br>TTATAACC<br>AA | <b>F:</b><br>GTTTGT<br>CTGTGGAT<br>GTGAGGTT<br><b>R:</b><br>CAGAAGCT<br>GCCTAGA<br>CGTTTT | <b>F:</b><br>ACAGAGGTCA<br>CCAGGCTATTA<br>ACC<br><b>R:</b><br>AAGGGAGAGT<br>AGATAACCTGT<br>TTCCA | <b>F:</b><br>TTACCTCAGT<br>TCCCAGGA<br>TGT<br><b>R:</b><br>CTCTAGCGG<br>GCAGCAAGA<br>AG | <b>F:</b><br>GGCGGTGCT<br>GTGCTTCTT<br><b>R:</b><br>TGCCGAGGC<br>TTCAACATT<br>ATATC | <b>F:</b><br>CTGAGCTTTC<br>CCTCCCTTT<br>C<br><b>R:</b><br>CGGAGCAAT<br>TCCGGTTGT |
| Taqman probe (TM assay)                                                                                                                                                                                                                                                                                                                                                                                                                                                                                                                                                                                                                                                                                                                                                                                                                                                                                                                                                                                                                                                                                                          | TCAGGTTT<br>CTCATGCA<br>GGGTTACA<br>GCAAC                                                            | CATTTGCA<br>CAGAGGTA<br>CCACGAGA<br>TTTAATTG<br>TT                                        | No probe (SG Assay)                                                                              | No probe (SG Assay)                                                                     | CTGCCCGCT<br>AGAGCAAGG<br>AGGGAT                                                    | ACCGCAACT<br>CAGCACAAAC<br>CAAGGATC                                              |
| H3K4me3                                                                                                                                                                                                                                                                                                                                                                                                                                                                                                                                                                                                                                                                                                                                                                                                                                                                                                                                                                                                                                                                                                                          |                                                                                                      |                                                                                           |                                                                                                  |                                                                                         |                                                                                     |                                                                                  |
| 1) ChIP/Input MEFB1                                                                                                                                                                                                                                                                                                                                                                                                                                                                                                                                                                                                                                                                                                                                                                                                                                                                                                                                                                                                                                                                                                              | 1) 0.01531                                                                                           | 1) 0.02686                                                                                | 1) 0.00630                                                                                       | 1) 0.01502                                                                              | 1) 0.02083                                                                          | ND                                                                               |
| 2) ChIP/Input MEFF                                                                                                                                                                                                                                                                                                                                                                                                                                                                                                                                                                                                                                                                                                                                                                                                                                                                                                                                                                                                                                                                                                               | 2) 0.08209                                                                                           | 2) 0.02277                                                                                | 2) 0.07139                                                                                       | 2) 12.27114                                                                             | 2) 4.87977                                                                          |                                                                                  |
| 3) Enrichment Expressed <sup>F</sup> / Silent <sup>B1</sup>                                                                                                                                                                                                                                                                                                                                                                                                                                                                                                                                                                                                                                                                                                                                                                                                                                                                                                                                                                                                                                                                      | 3) <b>5.35891</b>                                                                                    | 3) <b>0.84747</b>                                                                         | 3) <b>11.32509</b>                                                                               | 3) <b>816.83850</b>                                                                     | 3) <b>234.18800</b>                                                                 |                                                                                  |
| H3K4me2                                                                                                                                                                                                                                                                                                                                                                                                                                                                                                                                                                                                                                                                                                                                                                                                                                                                                                                                                                                                                                                                                                                          |                                                                                                      |                                                                                           |                                                                                                  |                                                                                         |                                                                                     |                                                                                  |
| 1) ChIP/Input MEFB1                                                                                                                                                                                                                                                                                                                                                                                                                                                                                                                                                                                                                                                                                                                                                                                                                                                                                                                                                                                                                                                                                                              | ND                                                                                                   | 1) 0.47628                                                                                | 1) 0.13593                                                                                       | 1) 0.02285                                                                              | 1) 0.05975                                                                          | 1) 0.04049                                                                       |
| 2) ChIP/Input MEFF                                                                                                                                                                                                                                                                                                                                                                                                                                                                                                                                                                                                                                                                                                                                                                                                                                                                                                                                                                                                                                                                                                               |                                                                                                      | 2) 1.42550                                                                                | 2) 7.40590                                                                                       | 2) 2.49985                                                                              | 2) 3.56607                                                                          | 2) 13.39350                                                                      |
| 3) Enrichment Expressed <sup>F</sup> / Silent <sup>B1</sup>                                                                                                                                                                                                                                                                                                                                                                                                                                                                                                                                                                                                                                                                                                                                                                                                                                                                                                                                                                                                                                                                      |                                                                                                      | 3) <b>2.99300</b>                                                                         | 3) <b>54.48000</b>                                                                               | 3) <b>109.35000</b>                                                                     | 3) <b>59.67900</b>                                                                  | 3) <b>330.78200</b>                                                              |
| H3K9me3                                                                                                                                                                                                                                                                                                                                                                                                                                                                                                                                                                                                                                                                                                                                                                                                                                                                                                                                                                                                                                                                                                                          |                                                                                                      |                                                                                           |                                                                                                  |                                                                                         |                                                                                     |                                                                                  |
| 1) ChIP/Input MEFB1                                                                                                                                                                                                                                                                                                                                                                                                                                                                                                                                                                                                                                                                                                                                                                                                                                                                                                                                                                                                                                                                                                              | ND                                                                                                   | ND                                                                                        | 1) 0.11458                                                                                       | 1) 0.25952                                                                              | ND                                                                                  | ND                                                                               |
| 2) ChIP/Input MEFF                                                                                                                                                                                                                                                                                                                                                                                                                                                                                                                                                                                                                                                                                                                                                                                                                                                                                                                                                                                                                                                                                                               |                                                                                                      |                                                                                           | 2) 0.00968                                                                                       | 2) 0.01483                                                                              |                                                                                     |                                                                                  |
| 3) Enrichment Silent <sup>B1</sup> / Expressed <sup>F</sup>                                                                                                                                                                                                                                                                                                                                                                                                                                                                                                                                                                                                                                                                                                                                                                                                                                                                                                                                                                                                                                                                      |                                                                                                      |                                                                                           | 3) <b>11.82759</b>                                                                               | 3) <b>17.49014</b>                                                                      |                                                                                     |                                                                                  |
| <p>Taqman probes and primers were designed by PrimerExpress and qPCR performed with the ABI PRISM 7000 using primers (900nM) and Taqman probe (200nM) under the following cycling conditions: 2 min 50°C, 10 min 95°C, 40 cycles of 15 s 95°C and 1 min 60°C. Quantification of Input and ChIP DNA amounts: DNA was extracted from MNase digested chromatin, equal amounts of MEFB1 and MEFF genomic DNAs were mixed and standard curves prepared for each real-time primer set. Relative quantification of Input and ChIP at different regions around <i>Air</i> promoter and statistics were performed as described in the manufacturer's protocol (Applied Biosystems). ChIP/Input ratio and the fold enrichment were calculated (expressed/silent or silent/expressed, B1=MEFB1, F=MEFF). *Note that the <i>Air</i>-Start SG assay overlaps the position of the <i>Air</i>-126 Taqman assay, yet produced 2–3 fold higher signals. The explanation for this difference is not clear since the SYBR green melting curves for this assay identified only one peak. TM Assay; Taqman Probe QPCR, SB Assay; SYBR GREEN QPCR.</p> |                                                                                                      |                                                                                           |                                                                                                  |                                                                                         |                                                                                     |                                                                                  |



**Table S2. Distribution Of Histone Modifications On DNaseI Hypersensitivity Sites**

| DHS site    | DHS present in MEFs | Single copy or Repetitive DHS | ECR non-ECR | Promoter expression in MEFs | Active histone modifications |                |                | Repressive histone modifications                                                                                                                              |
|-------------|---------------------|-------------------------------|-------------|-----------------------------|------------------------------|----------------|----------------|---------------------------------------------------------------------------------------------------------------------------------------------------------------|
|             |                     |                               |             |                             | H3K4me3                      | H3K4me2        | H3K9Ac         |                                                                                                                                                               |
| I***        | +                   | S/R                           | nd          | <i>Slc22a1</i> -silent      | - (P)<br>- (M)               | - (P)<br>- (M) | - (P)<br>- (M) | Tested:<br>H3K9me1,2,3<br>H4K20me1,2,3<br>H3K27me1,2,3<br><br>general absence of repressive histone modifications with the exception of H3K27me1 and H4K20me1 |
| II          | -                   | S                             | -           |                             | - (P)<br>- (M)               | - (P)<br>- (M) | - (P)<br>- (M) |                                                                                                                                                               |
| III         | +                   | R                             | -           |                             | - (P)<br>- (M)               | - (P)<br>- (M) | - (P)<br>- (M) |                                                                                                                                                               |
| IV          | +                   | S/R                           | -           |                             | - (P)<br>- (M)               | - (P)<br>- (M) | - (P)<br>- (M) |                                                                                                                                                               |
| V           | +                   | S                             | (+)         |                             | - (P)<br>- (M)               | - (P)<br>- (M) | - (P)<br>- (M) |                                                                                                                                                               |
| VI          | +                   | S                             | +           |                             | - (P)<br>- (M)               | + (P)<br>+ (M) | + (P)<br>+ (M) |                                                                                                                                                               |
| <b>VII</b>  | +                   | S                             | +           |                             | + (P)<br>- (M)               | + (P)<br>+ (M) | + (P)<br>+ (M) |                                                                                                                                                               |
| <b>VIII</b> | +                   | R                             | (+)         |                             | - (P)<br>- (M)               | + (P)<br>- (M) | + (P)<br>- (M) |                                                                                                                                                               |
| <b>IX**</b> | + (P)               | S                             | -           | <i>Air</i><br>Pat-exp       | + (P)<br>- (M)               | + (P)<br>- (M) | + (P)<br>- (M) |                                                                                                                                                               |
| <b>X</b>    | +                   | S/R                           | -           |                             | - (P)<br>- (M)               | + (P)<br>+ (M) | - (P)<br>+ (M) |                                                                                                                                                               |
| <b>XI</b>   | +                   | R                             | -           |                             | - (P)<br>- (M)               | + (P)<br>+ (M) | - (P)<br>+ (M) |                                                                                                                                                               |
| <b>XII*</b> | + (M)               | S                             | +           | <i>Igf2r</i><br>Mat-exp     | - (P)<br>+ (M)               | - (P)<br>+ (M) | - (P)<br>+ (M) |                                                                                                                                                               |
| XIII        | +                   | S/R                           | (+)         |                             | - (P)<br>- (M)               | + (P)<br>+ (M) | - (P)<br>- (M) |                                                                                                                                                               |
| XIV         | +                   | R                             | -           |                             | - (P)<br>- (M)               | + (P)<br>+ (M) | - (P)<br>- (M) |                                                                                                                                                               |
| <b>XV</b>   | +                   | S/R                           | -           |                             | - (P)<br>- (M)               | + (P)<br>- (M) | - (P)<br>+ (M) |                                                                                                                                                               |
| <b>XVI</b>  | +                   | S                             | +           |                             | - (P)<br>- (M)               | + (P)<br>- (M) | - (P)<br>+ (M) |                                                                                                                                                               |
| XVII        | -                   | S/R                           | -           |                             | - (P)<br>- (M)               | - (P)<br>- (M) | - (P)<br>- (M) |                                                                                                                                                               |
| XVIII       | +                   | S/R                           | -           |                             | - (P)<br>- (M)               | - (P)<br>- (M) | - (P)<br>- (M) |                                                                                                                                                               |
| XIX         | +                   | R                             | (+)         |                             | - (P)<br>- (M)               | - (P)<br>- (M) | - (P)<br>- (M) |                                                                                                                                                               |
| XX          | +                   | S/R                           | (+)         |                             | - (P)<br>- (M)               | - (P)<br>- (M) | - (P)<br>- (M) |                                                                                                                                                               |
| XXI         | -                   | S/R                           | -           |                             | - (P)<br>- (M)               | - (P)<br>- (M) | - (P)<br>- (M) |                                                                                                                                                               |

\*\*\**Slc22a1* promoter not expressed in MEF cells, \*\* *Air* promoter paternally expressed, \**Igf2r* promoter maternally expressed. Note that only DHS IX and XII that map to the transcription start respectively of *Air* and *Igf2r*, show parental-specificity in MEF cells while the remaining DHS are present on both parental chromosomes. DHS sites not present in MEF cells were identified in mouse organs or ES cells (Pauler et al., 2005). + or -; positive or negative signal in 2 ChIP-Chip biological replicates (Fig.3, Sup.Fig.4). Signals on DHS VII-XII were also verified by PCR (Sup.Tab.1). M; maternal chromosome, P; paternal chromosome, ECR; evolutionary conserved sequence. Histone modifications linked to X+XI (spanning 13 kb) and to XIV-XV (spanning 5.2 kb) appeared between these two pairs of neighboring DHS. Bold type; DHS showing specific histone modifications. ECRs, (+) indicates an ECR within 2kb of the DHS.

**Table S3. Characteristics of Heterochromatin peaks in the *Igf2r* imprinted gene cluster**

|                                    | <i>Air</i> promoter HC peak                         | <i>Igf2r</i> promoter HC peak                       | <i>Au76</i> -psg HC peak                             |
|------------------------------------|-----------------------------------------------------|-----------------------------------------------------|------------------------------------------------------|
| <b>H3K9me3</b>                     | Maternal +++                                        | Paternal ++                                         | Paternal +++                                         |
| <b>HP1</b> $\alpha, \beta, \gamma$ | Maternal ++ ( $\alpha, \beta, \gamma$ )             | Paternal + ( $\beta$ ), +/- ( $\gamma$ )            | -                                                    |
| <b>H4K20me3</b>                    | Maternal +++                                        | Paternal ++                                         | Paternal +++                                         |
| <b>ESET/SETDB1</b>                 | Maternal ++                                         | Paternal +                                          | Not detected                                         |
| <b>SUV39H null cells</b>           | Increased H3K9me3, HP1 $\beta$ and H4K20me3 signals | Increased H3K9me3, HP1 $\beta$ and H4K20me3 signals | No or minimal increased H3K9me3 and H4K20me3 signals |
| <b>SUV4-20H null cells</b>         | Unchanged H3K9me3                                   | not done                                            | Unchanged H3K9me3                                    |
| <b>AirT allele</b>                 | Present                                             | Absent                                              | Absent                                               |
| <b>Type of element</b>             | CpG island promoter 1.4kb                           | CpG island promoter 1.1kb                           | Pseudogene 2.3kb<br>Host gene: chr.15 Rangap1        |
| <b>Expression in MEF cells</b>     | Paternally expressed                                | Maternally expressed                                | Not expressed                                        |
| <b>DNA methylation</b>             | Maternal (high density) (98 CpGs in 1.4kb)          | Paternal (high density) (116 CpGs in 1.1kb kb)      | Bi-parental (low density) (31 CpGs in 2.3 kb)        |
| <b>Silencing mechanism</b>         | DNA methylation                                     | Air ncRNA expression                                | Promoter-less pseudogene                             |
| <b>Transcription overlap</b>       | Overlapped by <i>Igf2r</i> mRNA                     | Overlapped by <i>Air</i> ncRNA                      | Overlapped by <i>Air</i> ncRNA                       |

**Table S4. Antibodies Used For Chromatin Immunoprecipitation**

|                                                                                                                                                                                                                                                                                                                                               | <b>Antibody</b>                    | <b>Source</b>      | <b>Catalogue number</b> | <b>Lot numbers</b>    |
|-----------------------------------------------------------------------------------------------------------------------------------------------------------------------------------------------------------------------------------------------------------------------------------------------------------------------------------------------|------------------------------------|--------------------|-------------------------|-----------------------|
| 1                                                                                                                                                                                                                                                                                                                                             | H3K4me2                            | Upstate            | 07-030                  | 24727                 |
| 2                                                                                                                                                                                                                                                                                                                                             | H3K4me3                            | Upstate            | 07-473                  | 24503                 |
| 3                                                                                                                                                                                                                                                                                                                                             | H3K9Ac                             | Upstate            | 06-942                  | 23997                 |
| 4                                                                                                                                                                                                                                                                                                                                             | H3Ac (K9+K14 Ac)                   | Upstate            | 06-599                  | 25233                 |
| 5                                                                                                                                                                                                                                                                                                                                             | H4Ac (5,8,12,16 Ac)                | Upstate            | 06-866                  | 26393                 |
| 6                                                                                                                                                                                                                                                                                                                                             | H3K9me1                            | T. Jenuwein*       | 4858                    | 6 <sup>th</sup> bleed |
| 7                                                                                                                                                                                                                                                                                                                                             | H3K9me2                            | T. Jenuwein*       | 4677                    | 6 <sup>th</sup> bleed |
| 8                                                                                                                                                                                                                                                                                                                                             | H3K9me3                            | T. Jenuwein*       | 4861                    | 6 <sup>th</sup> bleed |
| 9                                                                                                                                                                                                                                                                                                                                             | H4K20me1                           | T. Jenuwein*       | 0077                    | 3 <sup>rd</sup> bleed |
| 10                                                                                                                                                                                                                                                                                                                                            | H4K20me2                           | T. Jenuwein*       | 0080                    | 5 <sup>th</sup> bleed |
| 11                                                                                                                                                                                                                                                                                                                                            | H4K20me3                           | T. Jenuwein*       | 0083                    | 5 <sup>th</sup> bleed |
| 12                                                                                                                                                                                                                                                                                                                                            | H3K27me1                           | T. Jenuwein*       | 8835                    | 5 <sup>th</sup> bleed |
| 13                                                                                                                                                                                                                                                                                                                                            | H3K27me2                           | T. Jenuwein*       | 8841                    | 5 <sup>th</sup> bleed |
| 14                                                                                                                                                                                                                                                                                                                                            | H3K27me3                           | T. Jenuwein*       | 6523                    | 5 <sup>th</sup> bleed |
| 15                                                                                                                                                                                                                                                                                                                                            | HP1 $\alpha$ (clone 15.19s2)       | Upstate            | 05-689                  | 24257                 |
| 16                                                                                                                                                                                                                                                                                                                                            | HP1                                | Abcam              | ab10478                 | 57611                 |
| 17                                                                                                                                                                                                                                                                                                                                            | HP1 $\gamma$ (clone 42s2)          | Upstate            | 05-690                  | 24258                 |
| 18                                                                                                                                                                                                                                                                                                                                            | ESET                               | Upstate            | 07-378                  | 24234, 31525.         |
| 19                                                                                                                                                                                                                                                                                                                                            | **Anti-chicken IgG                 | Sigma              | C2288                   | 084K4752              |
| 20                                                                                                                                                                                                                                                                                                                                            | ***G9a /Eu-HMTase 2 (clone A8620A) | Perseus Proteomics | PP-A8620A-00            | A1                    |
| 21                                                                                                                                                                                                                                                                                                                                            | G9a                                | Abcam              | ab40542                 | 248273                |
| 22                                                                                                                                                                                                                                                                                                                                            | ****SUV39H1                        | Abcam              | ab12405                 | 241399                |
| * specificity described in Perez-Burgos et al., 2004, Methods Enzymol. 376, 234-254<br>**Mock antibody control included in all ChIP experiments and no fragments were amplified from this material<br>***Tested for IP in Tachibana et al., 2005, Genes Dev.19:815<br>****This antibody failed to ChIP pericentric chromatin (data not shown) |                                    |                    |                         |                       |

**Table S5. Primer Pairs Used For ChIP-PCR**

| Primer Name                                                                                                                                                                                                 | Forward Sequence          | Reverse Sequence         |
|-------------------------------------------------------------------------------------------------------------------------------------------------------------------------------------------------------------|---------------------------|--------------------------|
| <b>Air Promoter</b>                                                                                                                                                                                         |                           |                          |
| 1                                                                                                                                                                                                           | AGTGGGTGGTAGGAATAGGG      | GCCTCTGAGCAGTTTCTCTG     |
| 2                                                                                                                                                                                                           | GGGTGAAGGAAGTGTCTCAC      | CCCCTCTCCAACCTTAAAGC     |
| 3                                                                                                                                                                                                           | CATGAAGGACTGACAGAATAACC   | TTACACCTGATCCTACTGTCCCTG |
| 4                                                                                                                                                                                                           | AGTCAGGGTGTGGATTCTGC      | GCAGAGAACGAATCATCCAAG    |
| 5                                                                                                                                                                                                           | GGCTTGCCTAGTGTATCTG       | TGCTCTGCAACATGACCTC      |
| 6                                                                                                                                                                                                           | TCACCTAGCGCTGAATCTC       | TCCAGGACTGTAAAGGCCATC    |
| 7*                                                                                                                                                                                                          | CCCTGATCACAGAACCCTTC      | AGGGTGAAAAGCTGCACAAG     |
| Primer pair 7 spans direct repeats in the middle of the Air CpG island and consistently produced two bands. The sequence of both fragments showed they arose from the correct DNA fragment (data not shown) |                           |                          |
| 8                                                                                                                                                                                                           | CAGAGGAGGTGGGAACAATG      | GCATTTTCGAGTGGATTACAGG   |
| 9                                                                                                                                                                                                           | GGCCTGAGAGCCATTTAAACTTAG  | CCTGAGATCCAAATAGGGGTGTG  |
| 10                                                                                                                                                                                                          | ACAGATGCTCCGCTTCCAG       | GTCTGAGGGCTGCCAAATAAC    |
| 11                                                                                                                                                                                                          | AAGACCACAGTTCATGCTG       | AGCCTCAGCCACTCAAGATG     |
| 12                                                                                                                                                                                                          | AAGAGCTGAAGGCAGCCATA      | TGAAGTCTAAAGTCACGGCACA   |
| <b>Igf2r Promoter</b>                                                                                                                                                                                       |                           |                          |
| 13                                                                                                                                                                                                          | TTTGACTTTTGACCCCTTGG      | TCAGCAACAGAGAGGGGAAGG    |
| 14                                                                                                                                                                                                          | CTTCTGAGCTTGGCACAC        | AGGCAGCTCTGTCTTCTG       |
| 15                                                                                                                                                                                                          | GAAGAGGCCAGGTAATGCAG      | GTACACAACCGGAGGTGATCC    |
| 16                                                                                                                                                                                                          | AGGCAGTCTTATGTGGTC        | ACCGTGTGTTCCAGTAACC      |
| 17                                                                                                                                                                                                          | CACTTGTGCATGGTCATCTC      | AACAGCTGCCTAGCTTTC       |
| 18                                                                                                                                                                                                          | AGCCATTGTTCAGTGGTTGAAG    | TCAGCCCGTCTCATCTCTG      |
| 19                                                                                                                                                                                                          | TCCACCAGTCACCTAATTGTC     | CCGGGTCACATGAGCATC       |
| 20                                                                                                                                                                                                          | GTGCTCCATTTCCAAAGC        | GGAGTTCATGTTTGTCTCTC     |
| 21                                                                                                                                                                                                          | AAAGCACAACATACCCATACAG    | CGGGTGCCATAGATTAACCA     |
| 22                                                                                                                                                                                                          | CTCTAGGGCAGTGTCTCAGG      | TGCTATGACTTATATTGGCATCC  |
| 23                                                                                                                                                                                                          | TCAATTAATCTCTGAAGGCAAGG   | GAATTAATCTAGTGAACCTCTCC  |
| 24                                                                                                                                                                                                          | AGAAGGGGCAACAGATGAAC      | GAAGGCGATTGAAAGTCACAG    |
| <b>Slc22a2 Promoter</b>                                                                                                                                                                                     |                           |                          |
| 25                                                                                                                                                                                                          | AAGGAAAGTGTGGATGGAG       | TGGCAGTGTGAAGGAAGC       |
| 26                                                                                                                                                                                                          | TCCGAGGTCTTCTGCTCCTG      | TCCAGCTTGGCTTATATGCAG    |
| 27                                                                                                                                                                                                          | TGAGGAACCCGATAGAAGATTG    | GTCAAGGAGAGCATCTTGTGTC   |
| 28                                                                                                                                                                                                          | AAGACTCTGAACCCACTCAATG    | TCTACCAGCTCAGTCCAACG     |
| 29                                                                                                                                                                                                          | TGGGTGAAGAGGAAGGACAC      | AGCGGCATTACAACAATCC      |
| 30                                                                                                                                                                                                          | TGCCTTCAGCAGCATTG         | GGTTCACAGTCCACCTCATACC   |
| 31                                                                                                                                                                                                          | TCTCCTTCCTCAGCCAGTG       | AGGGTTCTCCCTGACTACCTC    |
| 32                                                                                                                                                                                                          | TGAGGTAGTCAGGGAGAACC      | TGTCATGGTCTAACCTATAGCC   |
| 33                                                                                                                                                                                                          | CCACACAGCATACCTGAAC       | CTGTCCGTGTGTTGGATTG      |
| 34                                                                                                                                                                                                          | CAATCCAAAACACACCGACAG     | ACCAGAGCTAGGAGGCACAG     |
| 35                                                                                                                                                                                                          | GCTCTGTATAGATGGCCGTTAG    | TGTTAGGGAGGCTTGAGAAAG    |
| 36                                                                                                                                                                                                          | GCCACAAGAACACTGAC         | CTCAAGGAGGAGGGAAACTG     |
| <b>Slc22a3 Promoter</b>                                                                                                                                                                                     |                           |                          |
| 37                                                                                                                                                                                                          | ATGCAGGATTTCTCCTCACC      | GGTCTTCCACCTAGACTGC      |
| 38                                                                                                                                                                                                          | ACTCTGATTTGGCTGCAACTG     | CGATGCCAGAACCTATCTC      |
| 39                                                                                                                                                                                                          | TGACCATATCCCTTAAAGACAGC   | GGTCTAGTGTAGCCAAATCC     |
| 40                                                                                                                                                                                                          | GTTCTCTCAACCTGTGATTCC     | TTAAAGGGCAGATGTGGTG      |
| 41                                                                                                                                                                                                          | CATGGTCAGCCTTAGTCTGTG     | CCGACTCAATGTCTGCACCTC    |
| 42                                                                                                                                                                                                          | ACCATCGTCAGCCAGGTAAG      | TGGACACTGGAAGAAGTGTG     |
| 43                                                                                                                                                                                                          | GGTGCAGGTGCAGGTATGAA      | TCCTCAGTGCCTGGTCGAA      |
| 44                                                                                                                                                                                                          | ACATCACAAGCAGCCAAAC       | TCAGTGGCATTCCAGTACCC     |
| 45                                                                                                                                                                                                          | CACATCATGGTCCACAGAGC      | TGCTCCATTTACAGTCAAG      |
| 46                                                                                                                                                                                                          | CCTGGGCTGAACCTCAAAG       | TGACCTCCCTGCTCAGCTAC     |
| 47                                                                                                                                                                                                          | AAAGCAATGCAGATGAGCAG      | AGGAAATGGTTCCTGTGTTG     |
| 48                                                                                                                                                                                                          | ACTCCAGGAACTGGTATTGCTC    | CCTCACAGGTGTTCCACAATC    |
| <b>Au76-psg</b>                                                                                                                                                                                             |                           |                          |
| 49                                                                                                                                                                                                          | TCTATAGGTCTGTTGTGGTGGAAAC | AAGCCTGGTCAGCACTCTTC     |
| 50                                                                                                                                                                                                          | AGCTCCAGGTGGGCACATTC      | CCTCAAACAGTCTGTCCTGTGAG  |
| 51                                                                                                                                                                                                          | TGCAGGTACATGAAGAAGG       | ACGAGCAGGCTACCGAAAG      |
| 52                                                                                                                                                                                                          | TCCCATTCCCTAACAGACCA      | TAGAAGTTGCGGCTTGCATT     |
| 53                                                                                                                                                                                                          | CTGATGCAGGGAGAGGTTATAC    | ACGTCCCTTGTAGGAGCAG      |
| 54                                                                                                                                                                                                          | GAACCTGGTGTGAGGAGAGC      | GGCAACAAGCAATACAAGTCC    |
| 55                                                                                                                                                                                                          | CATCCAGCTTGGCTTAGAG       | CGGAAACCACCTTAGAAATGC    |
| 56                                                                                                                                                                                                          | GAAGCAGGCATACCTTAGTATGAG  | GACACAGGCAAAACAACCTAC    |
| 57                                                                                                                                                                                                          | CAGCTGTATGCAAGCTCCAC      | TGTTCAAGGCACACATACAAG    |
| 58                                                                                                                                                                                                          | CAGGAAGTACATGCCACAG       | AAGGTGGCATCTGTGTTTCC     |
| 59                                                                                                                                                                                                          | AGTCGGAGCTGAAGTGTGATGC    | CCACCTCACCTTCTCAATG      |
| 60                                                                                                                                                                                                          | GCTGAATGAGCCTCTGAAAG      | GGCCAGATGCTGTTTAC        |
| 61                                                                                                                                                                                                          | GCAGCCATAAAGAGAAAAGG      | GATGCTGGCTCAACAG         |
| <b>Pericentric region – major satellites</b>                                                                                                                                                                |                           |                          |
| 62                                                                                                                                                                                                          | GACGACTTGAAAAATGACGAAATC  | CATATTCAGGTC52TCAGTGTGC  |
| N.B., major satellites were analyzed with 12 PCR cycles (of 30 sec.@94°C, 40 sec.@94°C, 30 sec.@73°C) (Peters et al., Mol.Cell 12, 1577-89)                                                                 |                           |                          |

## Supplemental References

Lin, S.P., Youngson, N., Takada, S., Seitz, H., Reik, W., Paulsen, M., Cavaille, J., and Ferguson-Smith, A.C. (2003). Asymmetric regulation of imprinting on the maternal and paternal chromosomes at the Dlk1-Gtl2 imprinted cluster on mouse chromosome 12. *Nat. Genet.* 35, 97–102.

Pauler, F.M., Stricker, S.H., Warczok, K.E., and Barlow, D.P. (2005). Long-range DNase I hypersensitivity mapping reveals the imprinted *Igf2r* and *Air* promoters share cis-regulatory elements. *Genome Res.* 15, 1379–1387.

Schotta, G., Lachner, M., Sarma, K., Ebert, A., Sengupta, R., Reuter, G., Reinberg, D., and Jenuwein, T. (2004). A silencing pathway to induce H3-K9 and H4-K20 trimethylation at constitutive heterochromatin. *Genes Dev.* 18, 1251–1262.

Wutz, A., Theussl, H.C., Dausman, J., Jaenisch, R., Barlow, D.P., and Wagner, E.F. (2001). Non-imprinted *Igf2r* expression decreases growth and rescues the *Tme* mutation in mice. *Development* 128, 1881–1887.

Zwart, R., Sleutels, F., Wutz, A., Schinkel, A.H., and Barlow, D.P. (2001). Bidirectional action of the *Igf2r* imprint control element on upstream and downstream imprinted genes. *Genes Dev.* 15, 2361–2366.
